# Supplementary material for: Are low and middle-income countries prioritising high-value healthcare interventions?
Source: PubMed Central journal article supplement (PMC7042606; doi:10.1136/bmjgh-2019-001850), 2020-02-04
Supplement: bmjgh-2019-001850supp001.pdf [file bmjgh-2019-001850supp001.pdf]

## APPENDIX

Tables 1 and 2 below are extracted from the Tufts Medical Center Global Health Cost-Effectiveness Analysis (GHCEA) Registry, a repository of English-language cost-per-DALY studies indexed in PubMed that is sponsored by the Bill and Melinda Gates Foundation ([ghcearegistry.org](http://ghcearegistry.org)). The methodology of the GHCEA registry closely follows that of the CEA Registry ([cearegistry.org](http://cearegistry.org)) (a database of 8,056 cost-utility publications/analyses published from 1976 to 2018). A team of researchers systematically searches PubMed for articles with titles or abstracts containing either “disability-adjusted” or “DALY.” Every study that is part of the registry undergoes a formal review with a quality assurance protocol. Two reviewers trained in decision science and cost-effectiveness methodology independently screen each publication and extract data using a set of standardized forms. Data on methodology, interventions, and health outcomes are collected, and the two reviewers then meet for a consensus audit to resolve any discrepancies. The search protocols and inclusion criteria for the CEA Registry have been detailed elsewhere (1,2).

**Appendix, Table 1: Cost-Saving Interventions in LMICs (2008-2017)**

| N  | GBD classification | Intervention                                | Comparator                | Country/Region | Target Population            | Perspective      | Time horizon |
|----|--------------------|---------------------------------------------|---------------------------|----------------|------------------------------|------------------|--------------|
| 1  | HIV/AIDS           | HIV-ab testing screening of blood donations | None                      | Ghana          | All persons > 2 years of age | Limited Societal | Lifetime     |
| 2  | HIV/AIDS           | Efavirenz-based regimens                    | Nevirapine-based regimens | Thailand       | All persons aged 50          | Healthcare Payer | Lifetime     |
| 3  | HIV/AIDS           | Efavirenz-based regimens                    | Nevirapine-based regimens | Thailand       | All persons aged 60          | Healthcare Payer | Lifetime     |
| 4  | HIV/AIDS           | Efavirenz-based regimens                    | Nevirapine-based regimens | Thailand       | All persons aged 30          | Healthcare Payer | Lifetime     |
| 5  | HIV/AIDS           | Efavirenz-based regimens                    | Nevirapine-based regimens | Thailand       | All persons aged 40          | Healthcare Payer | Lifetime     |
| 6  | HIV/AIDS           | Efavirenz-based regimens                    | Nevirapine-based regimens | Thailand       | All persons aged 15-65       | Healthcare Payer | Lifetime     |
| 7  | HIV/AIDS           | Efavirenz-based regimens                    | Nevirapine-based regimens | Thailand       | All persons aged 15-65       | Healthcare Payer | Lifetime     |
| 8  | HIV/AIDS           | Efavirenz-based regimens                    | Nevirapine-based regimens | Thailand       | All persons aged 15-65       | Healthcare Payer | Lifetime     |
| 9  | HIV/AIDS           | Efavirenz-based regimens                    | Nevirapine-based regimens | Thailand       | All persons aged 15-65       | Healthcare Payer | Lifetime     |
| 10 | HIV/AIDS           | Efavirenz-based regimens                    | Nevirapine-based regimens | Thailand       | All persons aged 15-65       | Healthcare Payer | Lifetime     |

|    |                 |                                                                                                                                                                                   |                                                                                                                                                                      |          |                                 |                  |          |
|----|-----------------|-----------------------------------------------------------------------------------------------------------------------------------------------------------------------------------|----------------------------------------------------------------------------------------------------------------------------------------------------------------------|----------|---------------------------------|------------------|----------|
| 11 | Cervical cancer | Human papilloma virus 16/18 vaccination; vaccine cost of I\$25                                                                                                                    | Standard/Usual Care                                                                                                                                                  | Barbados | Females aged 9                  | Limited Societal | Lifetime |
| 12 | Tuberculosis    | Rapid drug susceptibility testing (DST) using direct amplification and reverse hybridization of the rpoB gene (INNOLiPA; Innogenetics) for the detection of Rif resistance        | rapid drug susceptibility testing (DST) using indirect proportion method on Lo <sup>o</sup> wenstein-Jensen medium (IDLJ) for the detection of Rif resistance        | Peru     | All persons, target age unknown | Healthcare Payer | Lifetime |
| 13 | Tuberculosis    | Rapid drug susceptibility testing (DST) using direct phage-replication assay (FASTPlaque-Response; Biotech) for the detection of Rif resistance                                   | rapid drug susceptibility testing (DST) using indirect proportion method on Lo <sup>o</sup> wenstein-Jensen medium (IDLJ) for the detection of Rif resistance        | Peru     | All persons, target age unknown | Healthcare Payer | Lifetime |
| 14 | Tuberculosis    | Rapid drug susceptibility testing (DST) using indirect proportion method on Lo <sup>o</sup> wenstein-Jensen medium (IDLJ) for the detection of rif resistance                     | None                                                                                                                                                                 | Peru     | All persons, target age unknown | Healthcare Payer | Lifetime |
| 15 | Tuberculosis    | Rapid drug susceptibility testing (DST) using the direct amplification and reverse hybridization of the rpoB gene (INNOLiPA; Innogenetics) for detection of multi drug resistance | None                                                                                                                                                                 | Peru     | All persons, target age unknown | Healthcare Payer | Lifetime |
| 16 | Tuberculosis    | Rapid drug susceptibility testing (DST) using the direct phage-replication assay (FASTPlaque-Response; Biotech) for detection of multi drug resistance                            | Rapid drug susceptibility testing (DST) using the indirect proportion method on Lo <sup>o</sup> wenstein-Jensen medium (IDLJ) for detection of multi drug resistance | Peru     | All persons, target age unknown | Healthcare Payer | Lifetime |
| 17 | Tuberculosis    | Rapid drug susceptibility testing (DST) using the direct proportion method on Lo <sup>o</sup> wenstein-Jensen medium (DLJ) for detection of multi drug resistance                 | Rapid drug susceptibility testing (DST) using the indirect proportion method on Lo <sup>o</sup> wenstein-Jensen medium (IDLJ) for detection of multi drug resistance | Peru     | All persons, target age unknown | Healthcare Payer | Lifetime |

|    |                                             |                                                                                                                                                                                    |                                                                                                                                                               |          |                                 |                  |          |
|----|---------------------------------------------|------------------------------------------------------------------------------------------------------------------------------------------------------------------------------------|---------------------------------------------------------------------------------------------------------------------------------------------------------------|----------|---------------------------------|------------------|----------|
| 18 | Tuberculosis                                | Rapid drug susceptibility testing (DST) using the direct proportion method on Lo <sup>o</sup> wenstein-Jensen medium (DLJ) for the detection of Rif resistance                     | rapid drug susceptibility testing (DST) using indirect proportion method on Lo <sup>o</sup> wenstein-Jensen medium (IDLJ) for the detection of Rif resistance | Peru     | All persons, target age unknown | Healthcare Payer | Lifetime |
| 19 | Tuberculosis                                | Rapid drug susceptibility testing (DST) using the indirect colorimetric minimum inhibitory concentration assay (MTT; ICN Biomedicals) for the detection of Rif resistance          | rapid drug susceptibility testing (DST) using indirect proportion method on Lo <sup>o</sup> wenstein-Jensen medium (IDLJ) for the detection of Rif resistance | Peru     | All persons, target age unknown | Healthcare Payer | Lifetime |
| 20 | Tuberculosis                                | Rapid drug susceptibility testing (DST) using the indirect colorimetric minimum inhibitory concentration assay (MTT assay; ICN Biomedicals) for detection of multi drug resistance | None                                                                                                                                                          | Peru     | All persons, target age unknown | Healthcare Payer | Lifetime |
| 21 | Tuberculosis                                | Rapid drug susceptibility testing (DST) using the indirect proportion method on Lo <sup>o</sup> wenstein-Jensen medium (IDLJ) for detection of multi drug resistance               | None                                                                                                                                                          | Peru     | All persons, target age unknown | Healthcare Payer | Lifetime |
| 22 | Sexually transmitted diseases excluding HIV | HPV 16, 18 vaccination                                                                                                                                                             | None                                                                                                                                                          | Comoros  | Females aged 9                  | Healthcare Payer | Lifetime |
| 23 | Sexually transmitted diseases excluding HIV | HPV 16, 18 vaccination                                                                                                                                                             | None                                                                                                                                                          | Djibouti | Females aged 9                  | Healthcare Payer | Lifetime |
| 24 | Sexually transmitted diseases excluding HIV | HPV 16, 18 vaccination                                                                                                                                                             | None                                                                                                                                                          | Eritrea  | Females aged 9                  | Healthcare Payer | Lifetime |
| 25 | Sexually transmitted diseases excluding HIV | HPV 16, 18 vaccination                                                                                                                                                             | None                                                                                                                                                          | Guinea   | Females aged 9                  | Healthcare Payer | Lifetime |

|           |                                                                   |                                                                                                                                        |                                         |                    |                                 |                  |          |
|-----------|-------------------------------------------------------------------|----------------------------------------------------------------------------------------------------------------------------------------|-----------------------------------------|--------------------|---------------------------------|------------------|----------|
| <b>26</b> | Sexually transmitted diseases excluding HIV                       | HPV 16, 18 vaccination                                                                                                                 | None                                    | Guyana             | Females aged 9                  | Healthcare Payer | Lifetime |
| <b>27</b> | Sexually transmitted diseases excluding HIV                       | HPV 16, 18 vaccination                                                                                                                 | None                                    | Lesotho            | Females aged 9                  | Healthcare Payer | Lifetime |
| <b>28</b> | Sexually transmitted diseases excluding HIV                       | HPV 16, 18 vaccination                                                                                                                 | None                                    | Nicaragua          | Females aged 9                  | Healthcare Payer | Lifetime |
| <b>29</b> | Sexually transmitted diseases excluding HIV                       | HPV 16, 18 vaccination                                                                                                                 | None                                    | Rwanda             | Females aged 9                  | Healthcare Payer | Lifetime |
| <b>30</b> | Sexually transmitted diseases excluding HIV                       | HPV 16, 18 vaccination                                                                                                                 | None                                    | Uganda             | Females aged 9                  | Healthcare Payer | Lifetime |
| <b>31</b> | Sexually transmitted diseases excluding HIV                       | HPV 16, 18 vaccination                                                                                                                 | None                                    | Zimbabwe           | Females aged 9                  | Healthcare Payer | Lifetime |
| <b>32</b> | HIV/AIDS                                                          | Pregnant women counseled, tested, and given highly active antiretroviral therapy for prevention of mother to child transmission of HIV | None                                    | Malawi             | Pregnant women & infants        | Limited Societal | Lifetime |
| <b>33</b> | Other communicable, maternal, neonatal, and nutritional disorders | Global Polio Eradication Initiative then no routine vaccination                                                                        | Standard/Usual Care-Routine vaccination | Multiple Countries | All persons, target age unknown | Healthcare Payer | 47 years |
| <b>34</b> | Other communicable, maternal, neonatal, and                       | Global Polio Eradication Initiative then universal IPV                                                                                 | Standard/Usual Care-Routine vaccination | Multiple Countries | All persons, target age unknown | Healthcare Payer | 47 years |

|    |                                             |                                                                                                                      |                     |                    |                                     |                   |          |
|----|---------------------------------------------|----------------------------------------------------------------------------------------------------------------------|---------------------|--------------------|-------------------------------------|-------------------|----------|
|    | nutritional disorders                       |                                                                                                                      |                     |                    |                                     |                   |          |
| 35 | HIV/AIDS                                    | Hematocrit test conducted at baseline (asymptomatic)                                                                 | None                | Haiti              | All persons 16 years of age & older | Healthcare Payer  | Lifetime |
| 36 | Diarrheal diseases                          | Quality Intervention (QI) to improve pediatric hospital care, specifically for diarrhea and pneumonia                | Standard/Usual Care | Nicaragua          | Infants < 5                         | Healthcare Payer  | 2 years  |
| 37 | Other maternal disorders                    | Gestational diabetes mellitus (GDM) screen and life style change                                                     | None                | India              | Pregnant women                      | Healthcare Payer  | MISSING  |
| 38 | Sexually transmitted diseases excluding HIV | New dual treponemal/nontreponemal point-of-care test (Dual-POC) for prenatal serological screening                   | None                | Multiple Countries | Pregnant women                      | Healthcare Sector | Lifetime |
| 39 | Sexually transmitted diseases excluding HIV | New dual treponemal/nontreponemal point-of-care test (Dual-POC) for prenatal serological screening                   | None                | Multiple Countries | Infants < 5                         | Healthcare Sector | Lifetime |
| 40 | Sexually transmitted diseases excluding HIV | Point-of-care treponemal immunochromatographic strip (ICS) test for prenatal serological screening                   | None                | Multiple Countries | Pregnant women                      | Healthcare Sector | Lifetime |
| 41 | Sexually transmitted diseases excluding HIV | Point-of-care treponemal immunochromatographic strip (ICS) test for prenatal serological screening                   | None                | Multiple Countries | Infants < 5                         | Healthcare Sector | Lifetime |
| 42 | Sexually transmitted diseases excluding HIV | Rapid plasma reagin plus Treponema pallidum passive particule agglutination assay for prenatal serological screening | None                | Multiple Countries | Pregnant women                      | Healthcare Sector | Lifetime |
| 43 | Sexually transmitted diseases excluding HIV | Rapid plasma reagin plus Treponema pallidum passive particule agglutination assay for prenatal serological screening | None                | Multiple Countries | Infants < 5                         | Healthcare Sector | Lifetime |
| 44 | Sexually transmitted diseases excluding HIV | Rapid plasma regain (RPR) test for prenatal serological screening                                                    | None                | Multiple Countries | Pregnant women                      | Healthcare Sector | Lifetime |

|    |                                             |                                                                                                 |                                             |                    |                                      |                   |          |
|----|---------------------------------------------|-------------------------------------------------------------------------------------------------|---------------------------------------------|--------------------|--------------------------------------|-------------------|----------|
| 45 | Sexually transmitted diseases excluding HIV | Rapid plasma regain (RPR) test for prenatal serological screening                               | None                                        | Multiple Countries | Infants < 5                          | Healthcare Sector | Lifetime |
| 46 | Malaria                                     | Parental artesunate                                                                             | Standard/Usual Care-Quinine dihydrochloride | Tanzania           | All persons between the ages 0-18    | Healthcare Payer  | Lifetime |
| 47 | Diarrheal diseases                          | Human papillomavirus (HPV) vaccine                                                              | None                                        | Comoros            | Infants < 5                          | Healthcare Payer  | Lifetime |
| 48 | Diarrheal diseases                          | Human papillomavirus (HPV) vaccine                                                              | None                                        | Djibouti           | Infants < 5                          | Healthcare Payer  | Lifetime |
| 49 | Diarrheal diseases                          | Human papillomavirus (HPV) vaccine                                                              | None                                        | Eritrea            | Infants < 5                          | Healthcare Payer  | Lifetime |
| 50 | Diarrheal diseases                          | Human papillomavirus (HPV) vaccine                                                              | None                                        | Guinea             | Infants < 5                          | Healthcare Payer  | Lifetime |
| 51 | Diarrheal diseases                          | Human papillomavirus (HPV) vaccine                                                              | None                                        | Guyana             | Infants < 5                          | Healthcare Payer  | Lifetime |
| 52 | Diarrheal diseases                          | Human papillomavirus (HPV) vaccine                                                              | None                                        | Lesotho            | Infants < 5                          | Healthcare Payer  | Lifetime |
| 53 | Diarrheal diseases                          | Human papillomavirus (HPV) vaccine                                                              | None                                        | Mauritania         | Infants < 5                          | Healthcare Payer  | Lifetime |
| 54 | Diarrheal diseases                          | Human papillomavirus (HPV) vaccine                                                              | None                                        | Nicaragua          | Infants < 5                          | Healthcare Payer  | Lifetime |
| 55 | Diarrheal diseases                          | Human papillomavirus (HPV) vaccine                                                              | None                                        | Rwanda             | Infants < 5                          | Healthcare Payer  | Lifetime |
| 56 | Diarrheal diseases                          | Human papillomavirus (HPV) vaccine                                                              | None                                        | Uganda             | Infants < 5                          | Healthcare Payer  | Lifetime |
| 57 | Diarrheal diseases                          | Human papillomavirus (HPV) vaccine                                                              | None                                        | Zimbabwe           | Infants < 5                          | Healthcare Payer  | Lifetime |
| 58 | Diarrheal diseases                          | Rotavirus vaccine                                                                               | None                                        | Angola             | Infants < 5                          | Healthcare Payer  | Lifetime |
| 59 | Schizophrenia                               | Clozapine to patients with highest severity (risperidone to remaining) plus family intervention | None                                        | Thailand           | All adult persons, age not specified | Limited Societal  | Lifetime |
| 60 | Schizophrenia                               | Risperidone                                                                                     | None                                        | Thailand           | All adult persons, age not specified | Limited Societal  | Lifetime |
| 61 | Schizophrenia                               | Risperidone plus family intervention consisting of weekly sessions with psychiatric nurse       | None                                        | Thailand           | All adult persons, age not specified | Limited Societal  | Lifetime |

|    |                                                           |                                                                                                   |                                                                                                       |                    |                                      |                  |          |
|----|-----------------------------------------------------------|---------------------------------------------------------------------------------------------------|-------------------------------------------------------------------------------------------------------|--------------------|--------------------------------------|------------------|----------|
| 62 | Schizophrenia                                             | Typical antipsychotics                                                                            | None                                                                                                  | Thailand           | All adult persons, age not specified | Limited Societal | Lifetime |
| 63 | Drug use disorders                                        | Excise tax increase                                                                               | None                                                                                                  | Vietnam            | All persons, target age unknown      | Healthcare Payer | 10 years |
| 64 | Drug use disorders                                        | Graphic warning labels on cigarette packs                                                         | None                                                                                                  | Vietnam            | All persons, target age unknown      | Healthcare Payer | 10 years |
| 65 | Drug use disorders                                        | Mass media campaign                                                                               | None                                                                                                  | Vietnam            | All persons, target age unknown      | Healthcare Payer | 10 years |
| 66 | Drug use disorders                                        | Smoking ban                                                                                       | None                                                                                                  | Vietnam            | All persons, target age unknown      | Healthcare Payer | 10 years |
| 67 | HIV/AIDS                                                  | Circumcision for prevention of heterosexual acquisition of HIV                                    | None                                                                                                  | Multiple Countries | Adult males, age not specified       | Healthcare Payer | Lifetime |
| 68 | Diarrheal diseases                                        | 2-dose rotavirus vaccination program                                                              | None                                                                                                  | China              | Infants < 5                          | Limited Societal | Lifetime |
| 69 | Other endocrine, nutritional, blood, and immune disorders | Congenital hypothyroidism screening with thyroid-stimulating hormone (TSH), cut-off point= 10mU/l | None                                                                                                  | Iran, Islamic Rep. | Infants 3-5 days old                 | Limited Societal | 82 years |
| 70 | Missing                                                   | Universal access to modern contraceptives                                                         | Standard/Usual Care- current contraceptive program                                                    | Uganda             | Females aged 15                      | Limited Societal | Lifetime |
| 71 | HIV/AIDS                                                  | Expanding antiretroviral treatment (ART) to CD4 count <350 + current prevention                   | Standard/Usual Care- Expanding antiretroviral treatment (ART) to CD4 count <200 + current prevention  | South Africa       | All persons aged 15-49               | Healthcare Payer | 40 years |
| 72 | HIV/AIDS                                                  | Expanding antiretroviral treatment (ART) to CD4 count <350 + enhanced prevention                  | Standard/Usual Care- Expanding antiretroviral treatment (ART) to CD4 count <200 + enhanced prevention | South Africa       | All persons aged 15-49               | Healthcare Payer | 40 years |
| 73 | HIV/AIDS                                                  | Expanding antiretroviral treatment (ART) to CD4 count <500 + current prevention                   | Expanding antiretroviral treatment (ART) to CD4 count <350 + current prevention                       | South Africa       | All persons aged 15-49               | Healthcare Payer | 40 years |

|    |                 |                                                                                                                      |                                                                                                      |              |                           |                  |          |
|----|-----------------|----------------------------------------------------------------------------------------------------------------------|------------------------------------------------------------------------------------------------------|--------------|---------------------------|------------------|----------|
| 74 | HIV/AIDS        | Expanding antiretroviral treatment (ART) to CD4 count <500 + enhanced prevention                                     | Expanding antiretroviral treatment (ART) to CD4 count <350 + enhanced prevention                     | South Africa | All persons aged 15-49    | Healthcare Payer | 40 years |
| 75 | HIV/AIDS        | Expanding antiretroviral treatment (ART) to all CD4 levels + current prevention                                      | Expanding antiretroviral treatment (ART) to CD4 count <500 + current prevention                      | South Africa | All persons aged 15-49    | Healthcare Payer | 40 years |
| 76 | HIV/AIDS        | Expanding antiretroviral treatment (ART) to all CD4 levels + current prevention                                      | Standard/Usual Care-Expanding antiretroviral treatment (ART) to CD4 count <200 + current prevention  | South Africa | All persons aged 15-49    | Healthcare Payer | 40 years |
| 77 | HIV/AIDS        | Expanding antiretroviral treatment (ART) to all CD4 levels + enhanced prevention                                     | Expanding antiretroviral treatment (ART) to CD4 count <500 + enhanced prevention                     | South Africa | All persons aged 15-49    | Healthcare Payer | 40 years |
| 78 | HIV/AIDS        | Expanding antiretroviral treatment (ART) to all CD4 levels + enhanced prevention                                     | Standard/Usual Care-Expanding antiretroviral treatment (ART) to CD4 count <200 + enhanced prevention | South Africa | All persons aged 15-49    | Healthcare Payer | 40 years |
| 79 | HIV/AIDS        | Integrated HIV testing, malaria, and diarrhea prevention campaign                                                    | None                                                                                                 | Kenya        | All persons, aged unknown | Healthcare Payer | Lifetime |
| 80 | Tuberculosis    | Patients' drug intake is supervised daily for 6 months by a family member (family-member DOT) at the patients' home. | Patients take their daily medication without supervision for 6 months.                               | Thailand     | All persons aged 15+      | Limited Societal | Lifetime |
| 81 | Tuberculosis    | Patients' drug intake is supervised daily for 6 months by a village health volunteer                                 | Patients take their daily medication without supervision for 6 months.                               | Thailand     | All persons aged 15+      | Limited Societal | Lifetime |
| 82 | Cervical cancer | Human papillomavirus (HPV) 16/18 vaccination                                                                         | None                                                                                                 | Algeria      | Females up to 12 years    | Limited Societal | Lifetime |
| 83 | Cervical cancer | Human papillomavirus (HPV) 16/18 vaccination                                                                         | None                                                                                                 | Bahrain      | Females up to 12 years    | Limited Societal | Lifetime |
| 84 | Cervical cancer | Human papillomavirus (HPV) 16/18 vaccination                                                                         | None                                                                                                 | Kuwait       | Females up to 12 years    | Limited Societal | Lifetime |
| 85 | Cervical cancer | Human papillomavirus (HPV) 16/18 vaccination                                                                         | None                                                                                                 | Morocco      | Females up to 12 years    | Limited Societal | Lifetime |
| 86 | Cervical cancer | Human papillomavirus (HPV) 16/18 vaccination                                                                         | None                                                                                                 | Oman         | Females up to 12 years    | Limited Societal | Lifetime |
| 87 | Cervical cancer | Human papillomavirus (HPV) 16/18 vaccination                                                                         | None                                                                                                 | Pakistan     | Females up to 12 years    | Limited Societal | Lifetime |



|            |                 |                                              |      |                      |                        |                  |          |
|------------|-----------------|----------------------------------------------|------|----------------------|------------------------|------------------|----------|
| <b>88</b>  | Cervical cancer | Human papillomavirus (HPV) 16/18 vaccination | None | Qatar                | Females up to 12 years | Limited Societal | Lifetime |
| <b>89</b>  | Cervical cancer | Human papillomavirus (HPV) 16/18 vaccination | None | United Arab Emirates | Females up to 12 years | Limited Societal | Lifetime |
| <b>90</b>  | Cervical cancer | HPV16/18 vaccination                         | None | Angola               | Females up to 12 years | Limited Societal | Lifetime |
| <b>91</b>  | Cervical cancer | HPV16/18 vaccination                         | None | Benin                | Females up to 12 years | Limited Societal | Lifetime |
| <b>92</b>  | Cervical cancer | HPV16/18 vaccination                         | None | Botswana             | Females up to 12 years | Limited Societal | Lifetime |
| <b>93</b>  | Cervical cancer | HPV16/18 vaccination                         | None | Burkina Faso         | Females up to 12 years | Limited Societal | Lifetime |
| <b>94</b>  | Cervical cancer | HPV16/18 vaccination                         | None | Burundi              | Females up to 12 years | Limited Societal | Lifetime |
| <b>95</b>  | Cervical cancer | HPV16/18 vaccination                         | None | Cabo Verde           | Females up to 12 years | Limited Societal | Lifetime |
| <b>96</b>  | Cervical cancer | HPV16/18 vaccination                         | None | Cameroon             | Females up to 12 years | Limited Societal | Lifetime |
| <b>97</b>  | Cervical cancer | HPV16/18 vaccination                         | None | Comoros              | Females up to 12 years | Limited Societal | Lifetime |
| <b>98</b>  | Cervical cancer | HPV16/18 vaccination                         | None | Congo, Rep.          | Females up to 12 years | Limited Societal | Lifetime |
| <b>99</b>  | Cervical cancer | HPV16/18 vaccination                         | None | Cote d'Ivoire        | Females up to 12 years | Limited Societal | Lifetime |
| <b>100</b> | Cervical cancer | HPV16/18 vaccination                         | None | Equatorial Guinea    | Females up to 12 years | Limited Societal | Lifetime |
| <b>101</b> | Cervical cancer | HPV16/18 vaccination                         | None | Gabon                | Females up to 12 years | Limited Societal | Lifetime |
| <b>102</b> | Cervical cancer | HPV16/18 vaccination                         | None | Gambia, The          | Females up to 12 years | Limited Societal | Lifetime |
| <b>103</b> | Cervical cancer | HPV16/18 vaccination                         | None | Ghana                | Females up to 12 years | Limited Societal | Lifetime |
| <b>104</b> | Cervical cancer | HPV16/18 vaccination                         | None | Guinea               | Females up to 12 years | Limited Societal | Lifetime |
| <b>105</b> | Cervical cancer | HPV16/18 vaccination                         | None | Guinea-Bissau        | Females up to 12 years | Limited Societal | Lifetime |
| <b>106</b> | Cervical cancer | HPV16/18 vaccination                         | None | Kenya                | Females up to 12 years | Limited Societal | Lifetime |
| <b>107</b> | Cervical cancer | HPV16/18 vaccination                         | None | Liberia              | Females up to 12 years | Limited Societal | Lifetime |

|            |                 |                      |      |                       |                        |                  |          |
|------------|-----------------|----------------------|------|-----------------------|------------------------|------------------|----------|
| <b>108</b> | Cervical cancer | HPV16/18 vaccination | None | Madagascar            | Females up to 12 years | Limited Societal | Lifetime |
| <b>109</b> | Cervical cancer | HPV16/18 vaccination | None | Malawi                | Females up to 12 years | Limited Societal | Lifetime |
| <b>110</b> | Cervical cancer | HPV16/18 vaccination | None | Mauritania            | Females up to 12 years | Limited Societal | Lifetime |
| <b>111</b> | Cervical cancer | HPV16/18 vaccination | None | Mauritius             | Females up to 12 years | Limited Societal | Lifetime |
| <b>112</b> | Cervical cancer | HPV16/18 vaccination | None | Mozambique            | Females up to 12 years | Limited Societal | Lifetime |
| <b>113</b> | Cervical cancer | HPV16/18 vaccination | None | Namibia               | Females up to 12 years | Limited Societal | Lifetime |
| <b>114</b> | Cervical cancer | HPV16/18 vaccination | None | Nigeria               | Females up to 12 years | Limited Societal | Lifetime |
| <b>115</b> | Cervical cancer | HPV16/18 vaccination | None | Rwanda                | Females up to 12 years | Limited Societal | Lifetime |
| <b>116</b> | Cervical cancer | HPV16/18 vaccination | None | Sao Tome and Principe | Females up to 12 years | Limited Societal | Lifetime |
| <b>117</b> | Cervical cancer | HPV16/18 vaccination | None | Senegal               | Females up to 12 years | Limited Societal | Lifetime |
| <b>118</b> | Cervical cancer | HPV16/18 vaccination | None | Seychelles            | Females up to 12 years | Limited Societal | Lifetime |
| <b>119</b> | Cervical cancer | HPV16/18 vaccination | None | Sierra Leone          | Females up to 12 years | Limited Societal | Lifetime |
| <b>120</b> | Cervical cancer | HPV16/18 vaccination | None | South Africa          | Females up to 12 years | Limited Societal | Lifetime |
| <b>121</b> | Cervical cancer | HPV16/18 vaccination | None | Swaziland             | Females up to 12 years | Limited Societal | Lifetime |
| <b>122</b> | Cervical cancer | HPV16/18 vaccination | None | Tanzania              | Females up to 12 years | Limited Societal | Lifetime |
| <b>123</b> | Cervical cancer | HPV16/18 vaccination | None | Togo                  | Females up to 12 years | Limited Societal | Lifetime |
| <b>124</b> | Cervical cancer | HPV16/18 vaccination | None | Uganda                | Females up to 12 years | Limited Societal | Lifetime |
| <b>125</b> | Cervical cancer | HPV16/18 vaccination | None | Zambia                | Females up to 12 years | Limited Societal | Lifetime |
| <b>126</b> | Cervical cancer | HPV16/18 vaccination | None | Zimbabwe              | Females up to 12 years | Limited Societal | Lifetime |

|     |                              |                                                                                                                                                                                                                                            |                                                                                                                                                                                                                                                                                             |                    |                                                   |                   |          |
|-----|------------------------------|--------------------------------------------------------------------------------------------------------------------------------------------------------------------------------------------------------------------------------------------|---------------------------------------------------------------------------------------------------------------------------------------------------------------------------------------------------------------------------------------------------------------------------------------------|--------------------|---------------------------------------------------|-------------------|----------|
| 127 | Lower respiratory infections | Haemophilus influenzae Type b (Hib) vaccination                                                                                                                                                                                            | None                                                                                                                                                                                                                                                                                        | Multiple Countries | Infants < 5                                       | Limited Societal  | Lifetime |
| 128 | Maternal haemorrhage         | Non-pneumatic anti-shock garment (NASG)                                                                                                                                                                                                    | NASG if mean arterial pressure (MAP) <60 mmHg (severe shock)                                                                                                                                                                                                                                | Egypt, Arab Rep.   | Pregnant women                                    | Healthcare Payer  | 10 years |
| 129 | Maternal haemorrhage         | Non-pneumatic anti-shock garment (NASG) if mean arterial pressure (MAP) <60 mmHg                                                                                                                                                           | None                                                                                                                                                                                                                                                                                        | Egypt, Arab Rep.   | Pregnant women                                    | Healthcare Payer  | 10 years |
| 130 | Alcohol use disorders        | Mass media campaign against drunk driving                                                                                                                                                                                                  | None                                                                                                                                                                                                                                                                                        | Thailand           | All persons, age not specified                    | Healthcare Sector | Lifetime |
| 131 | Alcohol use disorders        | Mass media campaign against drunk driving and random roadside breath testing                                                                                                                                                               | None                                                                                                                                                                                                                                                                                        | Thailand           | All persons, age not specified                    | Healthcare Sector | Lifetime |
| 132 | Alcohol use disorders        | Mass media campaign against drunk driving and selective roadside breath testing                                                                                                                                                            | None                                                                                                                                                                                                                                                                                        | Thailand           | All persons, age not specified                    | Healthcare Sector | Lifetime |
| 133 | Alcohol use disorders        | Random breath testing for Driving under the influence of alcohol                                                                                                                                                                           | None                                                                                                                                                                                                                                                                                        | Thailand           | All persons, age not specified                    | Healthcare Sector | Lifetime |
| 134 | Alcohol use disorders        | Selective breath testing for Driving under the influence of alcohol                                                                                                                                                                        | None                                                                                                                                                                                                                                                                                        | Thailand           | All persons, age not specified                    | Healthcare Sector | Lifetime |
| 135 | HIV/AIDS                     | Expanded eligibility for HIV + antiretroviral therapy treatment to all HIV + patients and expanded access in routine HIV testing and linkage to care such that 80% of HIV + infected persons will receive care when eligible for treatment | Implementation of program to expand eligibility for HIV + Antiretroviral therapy treatment to patients with CD4<500 cells/ml and to expand access in routine HIV testing and linkage to care such that 80% of HIV + infected persons will receive care when they are eligible for treatment | Zambia             | All persons equal or greater than 15 years of age | Healthcare Sector | 20 years |
| 136 | HIV/AIDS                     | Expanded eligibility for HIV + antiretroviral therapy treatment to all HIV + patients and expanded access in routine HIV testing and linkage to care such                                                                                  | Implementation of program to expanded access in routine HIV testing and linkage to care such that 80% of HIV + infected persons will receive                                                                                                                                                | Zambia             | All persons equal or greater than 15 years of age | Healthcare Sector | 20 years |

|     |                                |                                                                                                                                                 |                                                                                    |                    |                                      |                   |          |
|-----|--------------------------------|-------------------------------------------------------------------------------------------------------------------------------------------------|------------------------------------------------------------------------------------|--------------------|--------------------------------------|-------------------|----------|
|     |                                | that 80% of HIV + infected persons will receive care when eligible for treatment                                                                | care when they are eligible for treatment                                          |                    |                                      |                   |          |
| 137 | Malaria                        | RTS,S vaccine to prevent malaria                                                                                                                | None                                                                               | Malawi             | Infants, 5-12 months old             | Limited Societal  | Lifetime |
| 138 | Malaria                        | RTS,S vaccine to prevent malaria                                                                                                                | Wide-spread provision of long-lasting insecticide-treated nets (LLINs) to newborns | Malawi             | Infants, 5-12 months old             | Limited Societal  | Lifetime |
| 139 | Malaria                        | Wide-spread provision of long-lasting insecticide-treated nets (LLINs) to newborns                                                              | None                                                                               | Malawi             | Newborns                             | Limited Societal  | Lifetime |
| 140 | Tuberculosis                   | Strengthened standardised retreatment regimen (second-line drugs)                                                                               | Standard/Usual Care-Standard WHO recommended treatment strategy                    | Ecuador            | All persons, age not specified       | Limited Societal  | 10 years |
| 141 | Cardiomyopathy and myocarditis | Polypill (combining aspirin, beta blockers, angiotensin-converting enzyme inhibitors and statins) for prevention of acute myocardial infarction | Aspirin + beta blockers + angiotensin-converting enzyme inhibitors (ACEI) + statin | India              | All adult persons, age not specified | Healthcare Sector | Lifetime |
| 142 | Malaria                        | Dihydroartemisinin piperazine for first line treatment of plasmodium falciparum malaria (childhood malaria)                                     | Standard/Usual Care-Artemether-Lumefantrine for first line treatment               | Multiple Countries | Infants, 6-59 months                 | Healthcare Sector | 1 year   |
| 143 | Rheumatic heart disease        | Acute rheumatic fever and rheumatic heart disease control program: education, training, register development, and improved adherence program    | None                                                                               | Cuba               | All persons, aged 5-24               | Healthcare Payer  | Lifetime |
| 144 | HIV/AIDS                       | HIV self-testing                                                                                                                                | None                                                                               | Zimbabwe           | All persons, aged 15-65              | Healthcare Payer  | 20 years |
| 145 | Schizophrenia                  | Olanzapine                                                                                                                                      | None                                                                               | Vietnam            | All persons, aged 15+                | Healthcare Payer  | Lifetime |
| 146 | Schizophrenia                  | Risperidone                                                                                                                                     | None                                                                               | Vietnam            | All persons, aged 15+                | Healthcare Payer  | Lifetime |
| 147 | Schizophrenia                  | Risperidone + clozapine                                                                                                                         | None                                                                               | Vietnam            | All persons, aged 15+                | Healthcare Payer  | Lifetime |
| 148 | Schizophrenia                  | Risperidone + olanzapine                                                                                                                        | None                                                                               | Vietnam            | All persons, aged 15+                | Healthcare Payer  | Lifetime |

|     |                                         |                                                                                                                                       |                     |                    |                        |                   |          |
|-----|-----------------------------------------|---------------------------------------------------------------------------------------------------------------------------------------|---------------------|--------------------|------------------------|-------------------|----------|
| 149 | Schizophrenia                           | Risperidone plus family intervention                                                                                                  | None                | Vietnam            | All persons, aged 15+  | Healthcare Payer  | Lifetime |
| 150 | Schizophrenia                           | Typical antipsychotic drugs                                                                                                           | None                | Vietnam            | All persons, aged 15+  | Healthcare Payer  | Lifetime |
| 151 | Schizophrenia                           | Typical antipsychotic drugs + clozapine                                                                                               | None                | Vietnam            | All persons, aged 15+  | Healthcare Payer  | Lifetime |
| 152 | Schizophrenia                           | Typical antipsychotic drugs + olanzapine                                                                                              | None                | Vietnam            | All persons, aged 15+  | Healthcare Payer  | Lifetime |
| 153 | Schizophrenia                           | Typical antipsychotic drugs + risperidone                                                                                             | None                | Vietnam            | All persons, aged 15+  | Healthcare Payer  | Lifetime |
| 154 | Schizophrenia                           | Typical antipsychotic drugs plus family intervention                                                                                  | None                | Vietnam            | All persons, aged 15+  | Healthcare Payer  | Lifetime |
| 155 | Iron-deficiency anemia                  | Price subsidy accounting for 50% of cost fortified packaged infant cereals; lowest income quintile families eligible                  | None                | India              | Infants 6-23 months    | Limited Societal  | Lifetime |
| 156 | Neglected tropical diseases and malaria | Annual mass drug administration (MDA) of the Hookworm vaccine: 80% efficacy, 10 year duration of protection, 97% coverage, no booster | None                | Brazil             | Infants 5-14 months    | Limited Societal  | Lifetime |
| 157 | Neglected tropical diseases and malaria | Annual mass drug administration (MDA); 56.2% coverage, \$0.21 per child treated, 2010 GBD disability rate used                        | None                | Brazil             | Infants 5-14 months    | Limited Societal  | Lifetime |
| 158 | Breast cancer                           | Breast Cancer Screening using Mammography                                                                                             | Standard/Usual Care | Iran, Islamic Rep. | Females aged 35-69     | Healthcare Payer  | Lifetime |
| 159 | Diabetes mellitus                       | Benefit-based tailored treatment                                                                                                      | Target-to-treat     | China              | All persons aged 20-79 | Healthcare Sector | 10 years |
| 160 | Diabetes mellitus                       | Benefit-based tailored treatment                                                                                                      | Target-to-treat     | Ghana              | All persons aged 20-79 | Healthcare Sector | 10 years |
| 161 | Diabetes mellitus                       | Benefit-based tailored treatment                                                                                                      | Target-to-treat     | India              | All persons aged 20-79 | Healthcare Sector | 10 years |
| 162 | Diabetes mellitus                       | Benefit-based tailored treatment                                                                                                      | Target-to-treat     | Mexico             | All persons aged 20-79 | Healthcare Sector | 10 years |
| 163 | Diabetes mellitus                       | Benefit-based tailored treatment                                                                                                      | Target-to-treat     | South Africa       | All persons aged 20-79 | Healthcare Sector | 10 years |

|     |                        |                                                                                                                                                      |                                                                                                                                                  |                    |                                |                  |          |
|-----|------------------------|------------------------------------------------------------------------------------------------------------------------------------------------------|--------------------------------------------------------------------------------------------------------------------------------------------------|--------------------|--------------------------------|------------------|----------|
| 164 | Tuberculosis           | Combination (expand access to care; active case finding in the general population; introduce Xpert MTB/RIF for diagnosis; improve treatment quality) | Standard/Usual Care- base case levels                                                                                                            | India              | All persons, age not specified | Limited Societal | 10 years |
| 165 | Tuberculosis           | Expand access to tuberculosis treatment                                                                                                              | NoneStandard/Usual Care- base case levels                                                                                                        | India              | All persons, age not specified | Limited Societal | 10 years |
| 166 | Tuberculosis           | Expand access to tuberculosis treatment                                                                                                              | Standard/Usual Care- base case levels                                                                                                            | China              | All persons, age not specified | Limited Societal | 10 years |
| 167 | Tuberculosis           | Improve treatment for HIV and tuberculosis                                                                                                           | Standard/Usual Care- base case levels                                                                                                            | India              | All persons, age not specified | Limited Societal | 10 years |
| 168 | Tuberculosis           | Improve tuberculosis treatment                                                                                                                       | Standard/Usual Care- base case levels                                                                                                            | China              | All persons, age not specified | Limited Societal | 10 years |
| 169 | Ischemic heart disease | Legal limit on dietary trans fat                                                                                                                     | No EU action                                                                                                                                     | Multiple Countries | All persons, age not specified | Limited Societal | Lifetime |
| 170 | Ischemic heart disease | Voluntary agreements on dietary trans fat limit                                                                                                      | No EU action                                                                                                                                     | Multiple Countries | All persons, age not specified | Limited Societal | Lifetime |
| 171 | HIV/AIDS               | ART initiation with CD4 count > 500                                                                                                                  | Deferred ART initiation until decline in CD4 reaches < 350, development of AIDS, or development of other conditions necessitating ART initiation | India              | All persons aged 19-40 years   | Healthcare Payer | 5 years  |
| 172 | HIV/AIDS               | ART initiation with CD4 count > 500                                                                                                                  | Deferred ART initiation until decline in CD4 reaches < 350, development of AIDS, or development of other conditions necessitating ART initiation | Nigeria            | All persons aged 19-40 years   | Healthcare Payer | 5 years  |
| 173 | HIV/AIDS               | ART initiation with CD4 count > 500                                                                                                                  | Deferred ART initiation until decline in CD4 reaches < 350, development of AIDS, or development of other                                         | South Africa       | All persons aged 19-40 years   | Healthcare Payer | 5 years  |

|            |                              |                                                            |                                                                                                                                                                                             |                    |                                       |                  |          |
|------------|------------------------------|------------------------------------------------------------|---------------------------------------------------------------------------------------------------------------------------------------------------------------------------------------------|--------------------|---------------------------------------|------------------|----------|
| <b>174</b> | HIV/AIDS                     | ART initiation with CD4 count > 500                        | conditions necessitating ART initiation<br>Deferred ART initiation until decline in CD4 reaches < 350, development of AIDS, or development of other conditions necessitating ART initiation | Uganda             | All persons aged 19-40 years          | Healthcare Payer | 5 years  |
| <b>175</b> | Lymphatic filariasis         | Global Programme to Eliminate Lymphatic Filariasis (GPELF) | None                                                                                                                                                                                        | Multiple Countries | All adults at risk, age not specified | Limited Societal | Lifetime |
| <b>176</b> | Tuberculosis                 | Bedaquiline + background regimen                           | Standard/Usual Care                                                                                                                                                                         | China              | All adult persons, age not specified  | Healthcare Payer | 10 years |
| <b>177</b> | Tuberculosis                 | Bedaquiline + background regimen                           | Standard/Usual Care                                                                                                                                                                         | Estonia            | All adult persons, age not specified  | Healthcare Payer | 10 years |
| <b>178</b> | Tuberculosis                 | Bedaquiline + background regimen                           | Standard/Usual Care                                                                                                                                                                         | India              | All adult persons, age not specified  | Healthcare Payer | 10 years |
| <b>179</b> | Tuberculosis                 | Bedaquiline + background regimen                           | Standard/Usual Care                                                                                                                                                                         | Peru               | All adult persons, age not specified  | Healthcare Payer | 10 years |
| <b>180</b> | Tuberculosis                 | Bedaquiline + background regimen                           | Standard/Usual Care                                                                                                                                                                         | Philippines        | All adult persons, age not specified  | Healthcare Payer | 10 years |
| <b>181</b> | Tuberculosis                 | Bedaquiline + background regimen                           | Standard/Usual Care                                                                                                                                                                         | Russian Federation | All adult persons, age not specified  | Healthcare Payer | 10 years |
| <b>182</b> | Tuberculosis                 | Bedaquiline + background regimen                           | Standard/Usual Care                                                                                                                                                                         | South Africa       | All adult persons, age not specified  | Healthcare Payer | 10 years |
| <b>183</b> | Lower respiratory infections | 13-valent pneumococcal conjugate vaccine                   | None                                                                                                                                                                                        | Mongolia           | Infants < 5                           | Limited Societal | Lifetime |
| <b>184</b> | Malaria                      | Cotrimoxazole (CTX)                                        | 2-IPT Low (intermittent preventive treatment with sulfadoxine pyrimethamine)                                                                                                                | Mozambique         | Adult females                         | Limited Societal | 40 weeks |

|            |                                                            |                                                                                                                                         |                     |              |                                      |                  |          |
|------------|------------------------------------------------------------|-----------------------------------------------------------------------------------------------------------------------------------------|---------------------|--------------|--------------------------------------|------------------|----------|
| <b>185</b> | Tuberculosis                                               | Bedaquiline for extensively drug-resistant tuberculosis and standard regimen for multi-drug resistant/rifampicin-resistant tuberculosis | Standard/Usual Care | South Africa | All adult persons, age not specified | Healthcare Payer | 10 years |
| <b>186</b> | Communicable maternal, neonatal, and nutritional disorders | Enterovirus 71 vaccination at \$2.5 per dose                                                                                            | None                | China        | Infants < 5                          | Limited Societal | 5 years  |
| <b>187</b> | Communicable maternal, neonatal, and nutritional disorders | Enterovirus 71 vaccination at \$5 per dose                                                                                              | None                | China        | Infants < 5                          | Limited Societal | 5 years  |
| <b>188</b> | Communicable maternal, neonatal, and nutritional disorders | Enterovirus 71 vaccination at \$5.2 per dose                                                                                            | None                | China        | Infants < 5                          | Limited Societal | 5 years  |
| <b>189</b> | Neglected tropical diseases and malaria                    | Indoor residual spraying 100%                                                                                                           | None                | Mozambique   | General population, central region   | Limited Societal | 3 years  |
| <b>190</b> | Neglected tropical diseases and malaria                    | Indoor residual spraying 100%                                                                                                           | None                | Mozambique   | General population, southern region  | Limited Societal | 3 years  |
| <b>191</b> | Neglected tropical diseases and malaria                    | Indoor residual spraying 80%                                                                                                            | None                | Mozambique   | General population, southern region  | Limited Societal | 3 years  |
| <b>192</b> | Neglected tropical diseases and malaria                    | Indoor residual spraying at 100%                                                                                                        | None                | Mozambique   | General population, central region   | Limited Societal | 3 years  |
| <b>193</b> | Neglected tropical diseases and malaria                    | Indoor residual spraying at 100%                                                                                                        | None                | Mozambique   | General population, southern region  | Limited Societal | 3 years  |



|            |                                         |                                       |      |            |                                     |                  |          |
|------------|-----------------------------------------|---------------------------------------|------|------------|-------------------------------------|------------------|----------|
| <b>194</b> | Neglected tropical diseases and malaria | Long lasting insecticide nets at 100% | None | Mozambique | General population, central region  | Limited Societal | 3 years  |
| <b>195</b> | Neglected tropical diseases and malaria | Long lasting insecticide nets at 100% | None | Mozambique | General population, central region  | Limited Societal | 3 years  |
| <b>196</b> | Neglected tropical diseases and malaria | Long lasting insecticide nets at 100% | None | Mozambique | General population, northern region | Limited Societal | 3 years  |
| <b>197</b> | Neglected tropical diseases and malaria | Long lasting insecticide nets at 100% | None | Mozambique | General population, northern region | Limited Societal | 3 years  |
| <b>198</b> | Neglected tropical diseases and malaria | Long lasting insecticide nets at 100% | None | Mozambique | General population, southern region | Limited Societal | 3 years  |
| <b>199</b> | Neglected tropical diseases and malaria | Long lasting insecticide nets at 100% | None | Mozambique | General population, southern region | Limited Societal | 3 years  |
| <b>200</b> | Neglected tropical diseases and malaria | Long lasting insecticide nets at 80%  | None | Mozambique | General population, central region  | Limited Societal | 3 years  |
| <b>201</b> | Neglected tropical diseases and malaria | Long lasting insecticide nets at 80%  | None | Mozambique | General population, northern region | Limited Societal | 3 years  |
| <b>202</b> | Neglected tropical diseases and malaria | Long lasting insecticide nets at 80%  | None | Mozambique | General population, southern region | Limited Societal | 3 years  |
| <b>203</b> | Typhoid and paratyphoid fevers          | Routine typhoid conjugate vaccine     | None | India      | Infants, 9 months                   | Healthcare Payer | 10 years |

|            |                                |                                                                                                                        |                                                                                                                          |          |                                      |                  |          |
|------------|--------------------------------|------------------------------------------------------------------------------------------------------------------------|--------------------------------------------------------------------------------------------------------------------------|----------|--------------------------------------|------------------|----------|
| <b>204</b> | Typhoid and paratyphoid fevers | Routine typhoid conjugate vaccine                                                                                      | None                                                                                                                     | Vietnam  | Infants, 9 months                    | Healthcare Payer | 10 years |
| <b>205</b> | Hepatitis                      | Directly-acting antiviral-based treatment                                                                              | None                                                                                                                     | India    | All persons, 35 years                | Healthcare Payer | Lifetime |
| <b>206</b> | Tuberculosis                   | Light-emitting diode (LED) fluorescence microscopy using two sputum samples provided on the same day (FN-Spot-Spot)    | Standard/Usual Care- Ziehl-Neelsen microscopy using three sputum samples provided within two days (ZN-Spot-Morning-Spot) | Ethiopia | All adult persons, age not specified | Healthcare Payer | 10 years |
| <b>207</b> | Tuberculosis                   | Light-emitting diode (LED) fluorescence microscopy using two sputum samples provided within two days (FN-Spot-Morning) | Standard/Usual Care- Ziehl-Neelsen microscopy using three sputum samples provided within two days (ZN-Spot-Morning-Spot) | Ethiopia | All adult persons, age not specified | Healthcare Payer | 10 years |

**Appendix, Table 2: Sampled countries/interventions (2008-2017)**

Malawi, Zimbabwe, South Africa, Zambia, Nigeria, Lesotho, Sierra Leone, Swaziland, Uganda, Liberia\*

| GBD classification + intervention area                               | Intervention                                                                                                                           | Comparator                                                                         | Country/Region              | Target Population      | Included? | Source |
|----------------------------------------------------------------------|----------------------------------------------------------------------------------------------------------------------------------------|------------------------------------------------------------------------------------|-----------------------------|------------------------|-----------|--------|
| <b>HIV/AIDS</b><br>Prevention of mother to child transmission of HIV | Pregnant women counseled, tested, and given highly active antiretroviral therapy for prevention of mother to child transmission of HIV | None                                                                               | Malawi                      | Pregnant women         | √         | (3)    |
| <b>Cervical cancer</b><br>HPV vaccination                            | HPV16/18 vaccination                                                                                                                   | None                                                                               | Malawi                      | Females up to 12 years | √         | (3)    |
| <b>Malaria</b><br>Malaria vaccination                                | RTS,S vaccine to prevent malaria                                                                                                       | None                                                                               | Malawi                      | Infants 5-12 months    | X         | (3,4)  |
|                                                                      | RTS,S vaccine to prevent malaria                                                                                                       | Wide-spread provision of long-lasting insecticide-treated nets (LLINs) to newborns | Malawi                      | Infants 5-12 months    | X         | (3,4)  |
| <b>Malaria</b><br>LLINs for malaria prevention                       | Wide-spread provision of long-lasting insecticide-treated nets (LLINs) to newborns                                                     | None                                                                               | Malawi                      | Newborns               | √         | (3–5)  |
| <b>Syphilis</b><br>Prenatal serological screening for syphilis       | New dual treponemal/nontreponemal point-of-care test (Dual-POC) for prenatal serological screening                                     | None                                                                               | Malawi + multiple countries | Pregnant women         | √         | (3,5)  |
|                                                                      | New dual treponemal/nontreponemal point-of-care test (Dual-POC) for prenatal serological screening                                     | None                                                                               | Malawi + multiple countries | Infants < 5            | √         | (3,5)  |
|                                                                      | Point-of-care treponemal immunochromatographic strip (ICS) test for prenatal serological screening                                     | None                                                                               | Malawi + multiple countries | Pregnant women         | √         | (3,5)  |
|                                                                      | Point-of-care treponemal immunochromatographic strip (ICS) test for prenatal serological screening                                     | None                                                                               | Malawi + multiple countries | Infants < 5            | √         | (3,5)  |

- √ Available policy documentation matches cost-saving intervention area  
 — Cost-saving intervention area not explicitly specified  
 X Cost-saving intervention area not mentioned in available policy documentation

|                                                                              |                                                                                                                      |      |                               |                                       |   |       |
|------------------------------------------------------------------------------|----------------------------------------------------------------------------------------------------------------------|------|-------------------------------|---------------------------------------|---|-------|
|                                                                              | Rapid plasma reagin plus Treponema pallidum passive particule agglutination assay for prenatal serological screening | None | Malawi + multiple countries   | Pregnant women                        | √ | (3,5) |
|                                                                              | Rapid plasma reagin plus Treponema pallidum passive particule agglutination assay for prenatal serological screening | None | Malawi + multiple countries   | Infants < 5                           | √ | (3,5) |
|                                                                              | Rapid plasma regain (RPR) test for prenatal serological screening                                                    | None | Malawi + multiple countries   | Pregnant women                        | √ | (3,5) |
|                                                                              | Rapid plasma regain (RPR) test for prenatal serological screening                                                    | None | Malawi + multiple countries   | Infants < 5                           | √ | (3,5) |
| <b>HIV/AIDS</b>                                                              |                                                                                                                      |      |                               |                                       |   |       |
| Circumcision for HIV prevention                                              | Circumcision for prevention of heterosexual acquisition of HIV                                                       | None | Malawi + multiple countries   | Adult males, age not specified        | √ | (6)   |
| <b>H influenzae type B (Hib) vaccination</b>                                 | Haemophilus influenzae Type b (Hib) vaccination                                                                      | None | Malawi + multiple countries   | Infants < 5                           | √ | (3)   |
| <b>Lymphatic filariasis</b>                                                  | Global Programme to Eliminate Lymphatic Filariasis (GPELF)                                                           | None | Malawi + multiple countries   | All adults at risk, age not specified | X | (3)   |
| <b>Sexually transmitted diseases (except HIV, cervical cancer, diarrhea)</b> |                                                                                                                      |      |                               |                                       |   |       |
| HPV vaccination                                                              | HPV 16, 18 vaccination                                                                                               | None | Zimbabwe                      | Females aged 9                        | √ | (7)   |
|                                                                              | Human papillomavirus (HPV) vaccine                                                                                   | None | Zimbabwe                      | Infants < 5                           | √ | (7)   |
|                                                                              | HPV16/18 vaccination                                                                                                 | None | Zimbabwe                      | Females up to 12 years                | √ | (7)   |
| <b>HIV/AIDS</b>                                                              |                                                                                                                      |      |                               |                                       |   |       |
| HIV self-testing                                                             | HIV self-testing                                                                                                     | None | Zimbabwe                      | All persons aged 15-65                | √ | (8)   |
| <b>Syphilis</b>                                                              |                                                                                                                      |      |                               |                                       |   |       |
| Prenatal serological screening for syphilis                                  | New dual treponemal/nontreponemal point-of-care test (Dual-POC) for prenatal serological screening                   | None | Zimbabwe + multiple countries | Pregnant women                        | - | (9)   |
|                                                                              | New dual treponemal/nontreponemal point-of-care test (Dual-POC) for prenatal serological screening                   | None | Zimbabwe + multiple countries | Infants < 5                           | - | (9)   |
|                                                                              | Point-of-care treponemal immunochromatographic strip (ICS)                                                           | None | Zimbabwe + multiple countries | Pregnant women                        | - | (9)   |

|                                              |                                                                                                                      |                                                                                                      |                               |                                |   |      |
|----------------------------------------------|----------------------------------------------------------------------------------------------------------------------|------------------------------------------------------------------------------------------------------|-------------------------------|--------------------------------|---|------|
|                                              | test for prenatal serological screening                                                                              |                                                                                                      |                               |                                |   |      |
|                                              | Point-of-care treponemal immunochromatographic strip (ICS) test for prenatal serological screening                   | None                                                                                                 | Zimbabwe + multiple countries | Infants < 5                    | — | (9)  |
|                                              | Rapid plasma reagin plus Treponema pallidum passive particule agglutination assay for prenatal serological screening | None                                                                                                 | Zimbabwe + multiple countries | Pregnant women                 | — | (9)  |
|                                              | Rapid plasma reagin plus Treponema pallidum passive particule agglutination assay for prenatal serological screening | None                                                                                                 | Zimbabwe + multiple countries | Infants < 5                    | — | (9)  |
|                                              | Rapid plasma regain (RPR) test for prenatal serological screening                                                    | None                                                                                                 | Zimbabwe + multiple countries | Pregnant women                 | — | (9)  |
|                                              | Rapid plasma regain (RPR) test for prenatal serological screening                                                    | None                                                                                                 | Zimbabwe + multiple countries | Infants < 5                    | — | (9)  |
| <b>HIV/AIDS</b>                              | Circumcision for prevention of heterosexual acquisition of HIV                                                       | None                                                                                                 | Zimbabwe + multiple countries | Adult males, age not specified | √ | (8)  |
| <b>H influenzae type B (Hib) vaccination</b> | influenzae Type b (Hib) vaccination                                                                                  | None                                                                                                 | Zimbabwe + multiple countries | Infants < 5                    | √ | (7)  |
| <b>HIV/AIDS</b>                              | Expanded antiretroviral treatment (ART) for HIV, irrespective of CD4 count                                           | Standard/Usual Care-Expanding antiretroviral treatment (ART) to CD4 count <200 + current prevention  | South Africa                  | All persons aged 15-49         | √ | (10) |
|                                              | Expanding antiretroviral treatment (ART) to CD4 count <350 + enhanced prevention                                     | Standard/Usual Care-Expanding antiretroviral treatment (ART) to CD4 count <200 + enhanced prevention | South Africa                  | All persons aged 15-49         | √ | (10) |
|                                              | Expanding antiretroviral treatment (ART) to CD4 count <500 + current prevention                                      | Expanding antiretroviral treatment (ART) to CD4 count <350 + current prevention                      | South Africa                  | All persons aged 15-49         | √ | (10) |

|                                                          |                                                                                                                                         |                                                                                                                                                  |              |                               |   |      |
|----------------------------------------------------------|-----------------------------------------------------------------------------------------------------------------------------------------|--------------------------------------------------------------------------------------------------------------------------------------------------|--------------|-------------------------------|---|------|
|                                                          | Expanding antiretroviral treatment (ART) to CD4 count <500 + enhanced prevention                                                        | Expanding antiretroviral treatment (ART) to CD4 count <350 + enhanced prevention                                                                 | South Africa | All persons aged 15-49        | √ | (10) |
|                                                          | Expanding antiretroviral treatment (ART) to all CD4 levels + current prevention                                                         | Expanding antiretroviral treatment (ART) to CD4 count <500 + current prevention                                                                  | South Africa | All persons aged 15-49        | √ | (10) |
|                                                          | Expanding antiretroviral treatment (ART) to all CD4 levels + current prevention                                                         | Standard/Usual Care-<br>Expanding antiretroviral treatment (ART) to CD4 count <200 + current prevention                                          | South Africa | All persons aged 15-49        | √ | (10) |
|                                                          | Expanding antiretroviral treatment (ART) to all CD4 levels + enhanced prevention                                                        | Expanding antiretroviral treatment (ART) to CD4 count <500 + enhanced prevention                                                                 | South Africa | All persons aged 15-49        | √ | (10) |
|                                                          | Expanding antiretroviral treatment (ART) to all CD4 levels + enhanced prevention                                                        | Standard/Usual Care-<br>Expanding antiretroviral treatment (ART) to CD4 count <200 + enhanced prevention                                         | South Africa | All persons aged 15-49        | √ | (10) |
|                                                          | ART initiation with CD4 count > 500                                                                                                     | Deferred ART initiation until decline in CD4 reaches < 350, development of AIDS, or development of other conditions necessitating ART initiation | South Africa | All persons aged 19-40        | √ | (10) |
| <b>Cervical cancer</b><br>HPV vaccination                | HPV16/18 vaccination                                                                                                                    | None                                                                                                                                             | South Africa | Females up to age 12          | √ | (11) |
| <b>Diabetes mellitus</b>                                 | Benefit-based tailored treatment                                                                                                        | Target-to-treat                                                                                                                                  | South Africa | All persons aged 20-79        | - | (11) |
| <b>Tuberculosis</b><br>Bedaquiline for drug-resistant TB | Bedaquiline + background regimen                                                                                                        | Standard/Usual Care                                                                                                                              | South Africa | All adults, age not specified | √ | (10) |
|                                                          | Bedaquiline for extensively drug-resistant tuberculosis and standard regimen for multi-drug resistant/rifampicin-resistant tuberculosis | Standard/Usual Care                                                                                                                              | South Africa | All adults, age not specified | √ | (10) |

|                                                                                               |                                                                                                                                                                                                                                            |                                                                                                                                                                                         |                                          |                                             |   |      |
|-----------------------------------------------------------------------------------------------|--------------------------------------------------------------------------------------------------------------------------------------------------------------------------------------------------------------------------------------------|-----------------------------------------------------------------------------------------------------------------------------------------------------------------------------------------|------------------------------------------|---------------------------------------------|---|------|
| <b>Syphilis</b><br>Prenatal serological screening for syphilis                                | New dual treponemal/nontreponemal point-of-care test (Dual-POC) for prenatal serological screening                                                                                                                                         | None                                                                                                                                                                                    | South Africa + <i>multiple countries</i> | Pregnant women                              | √ | (10) |
|                                                                                               | New dual treponemal/nontreponemal point-of-care test (Dual-POC) for prenatal serological screening                                                                                                                                         | None                                                                                                                                                                                    | South Africa + <i>multiple countries</i> | Infants < 5                                 | √ | (10) |
|                                                                                               | Point-of-care treponemal immunochromatographic strip (ICS) test for prenatal serological screening                                                                                                                                         | None                                                                                                                                                                                    | South Africa + <i>multiple countries</i> | Pregnant women                              | √ | (10) |
|                                                                                               | Point-of-care treponemal immunochromatographic strip (ICS) test for prenatal serological screening                                                                                                                                         | None                                                                                                                                                                                    | South Africa + <i>multiple countries</i> | Infants < 5                                 | √ | (10) |
|                                                                                               | Rapid plasma reagin plus Treponema pallidum passive particule agglutination assay for prenatal serological screening                                                                                                                       | None                                                                                                                                                                                    | South Africa + <i>multiple countries</i> | Pregnant women                              | √ | (10) |
|                                                                                               | Rapid plasma reagin plus Treponema pallidum passive particule agglutination assay for prenatal serological screening                                                                                                                       | None                                                                                                                                                                                    | South Africa + <i>multiple countries</i> | Infants < 5                                 | √ | (10) |
|                                                                                               | Rapid plasma regain (RPR) test for prenatal serological screening                                                                                                                                                                          | None                                                                                                                                                                                    | South Africa + <i>multiple countries</i> | Pregnant women                              | √ | (10) |
|                                                                                               | Rapid plasma regain (RPR) test for prenatal serological screening                                                                                                                                                                          | None                                                                                                                                                                                    | South Africa + <i>multiple countries</i> | Infants < 5                                 | √ | (10) |
| <b>HIV/AIDS</b><br>Circumcision for HIV prevention                                            | Circumcision for prevention of heterosexual acquisition of HIV                                                                                                                                                                             | None                                                                                                                                                                                    | South Africa + <i>multiple countries</i> | Adult males, age not specified              | √ | (10) |
| <b>Cervical cancer</b><br>HPV vaccination                                                     | HPV16/18 vaccination                                                                                                                                                                                                                       | None                                                                                                                                                                                    | Zambia                                   | Females up to age 12                        | √ | (12) |
| <b>HIV/AIDS</b><br>Expanded antiretroviral treatment (ART) for HIV, irrespective of CD4 count | Expanded eligibility for HIV + antiretroviral therapy treatment to all HIV + patients and expanded access in routine HIV testing and linkage to care such that 80% of HIV + infected persons will receive care when eligible for treatment | Implementation of program to expand eligibility for HIV + Antiretroviral therapy treatment to patients with CD4<500 cells/ml and to expand access in routine HIV testing and linkage to | Zambia                                   | All persons greater than or equal to age 15 | √ | (13) |

|                                                                |                                                                                                                                                                                                                                            |                                                                                                                                                                                        |                             |                                             |   |            |
|----------------------------------------------------------------|--------------------------------------------------------------------------------------------------------------------------------------------------------------------------------------------------------------------------------------------|----------------------------------------------------------------------------------------------------------------------------------------------------------------------------------------|-----------------------------|---------------------------------------------|---|------------|
|                                                                |                                                                                                                                                                                                                                            | care such that 80% of HIV + infected persons will receive care when they are eligible for treatment                                                                                    |                             |                                             |   |            |
|                                                                | Expanded eligibility for HIV + antiretroviral therapy treatment to all HIV + patients and expanded access in routine HIV testing and linkage to care such that 80% of HIV + infected persons will receive care when eligible for treatment | Implementation of program to expanded access in routine HIV testing and linkage to care such that 80% of HIV + infected persons will receive care when they are eligible for treatment | Zambia                      | All persons greater than or equal to age 15 | √ | (13)       |
| <b>Syphilis</b><br>Prenatal serological screening for syphilis | New dual treponemal/nontreponemal point-of-care test (Dual-POC) for prenatal serological screening                                                                                                                                         | None                                                                                                                                                                                   | Zambia + multiple countries | Pregnant women                              | — | (12,14,15) |
|                                                                | New dual treponemal/nontreponemal point-of-care test (Dual-POC) for prenatal serological screening                                                                                                                                         | None                                                                                                                                                                                   | Zambia + multiple countries | Infants < 5                                 | — | (12,14,15) |
|                                                                | Point-of-care treponemal immunochromatographic strip (ICS) test for prenatal serological screening                                                                                                                                         | None                                                                                                                                                                                   | Zambia + multiple countries | Pregnant women                              | — | (12,14,15) |
|                                                                | Point-of-care treponemal immunochromatographic strip (ICS) test for prenatal serological screening                                                                                                                                         | None                                                                                                                                                                                   | Zambia + multiple countries | Infants < 5                                 | — | (12,14,15) |
|                                                                | Rapid plasma reagin plus Treponema pallidum passive particule agglutination assay for prenatal serological screening                                                                                                                       | None                                                                                                                                                                                   | Zambia + multiple countries | Pregnant women                              | — | (12,14,15) |
|                                                                | Rapid plasma reagin plus Treponema pallidum passive particule agglutination assay for prenatal serological screening                                                                                                                       | None                                                                                                                                                                                   | Zambia + multiple countries | Infants < 5                                 | — | (12,14,15) |
|                                                                | Rapid plasma regain (RPR) test for prenatal serological screening                                                                                                                                                                          | None                                                                                                                                                                                   | Zambia + multiple countries | Pregnant women                              | — | (12,14,15) |
|                                                                | Rapid plasma regain (RPR) test for prenatal serological screening                                                                                                                                                                          | None                                                                                                                                                                                   | Zambia + multiple countries | Infants < 5                                 | — | (12,14,15) |



|                                                                                               |                                                                                                                      |                                                                                                                                                  |                                        |                                   |   |         |
|-----------------------------------------------------------------------------------------------|----------------------------------------------------------------------------------------------------------------------|--------------------------------------------------------------------------------------------------------------------------------------------------|----------------------------------------|-----------------------------------|---|---------|
| <b>HIV/AIDS</b><br>Circumcision for HIV prevention                                            | Circumcision for prevention of heterosexual acquisition of HIV                                                       | None                                                                                                                                             | Zambia +<br><i>multiple countries</i>  | Adult males,<br>age not specified | √ | (12,13) |
| <b>H influenzae type B (Hib) vaccination</b>                                                  | Haemophilus influenzae Type b (Hib) vaccination                                                                      | None                                                                                                                                             | Zambia +<br><i>multiple countries</i>  | Infants < 5                       | √ | (14,16) |
| <b>Malaria</b><br><b>Dihydroartemisinin piperazine for first-line treatment</b>               | Dihydroartemisinin piperazine for first line treatment of plasmodium falciparum malaria (childhood malaria)          | Standard/Usual Care-Artemether-Lumefantrine for first line treatment                                                                             | Zambia +<br><i>multiple countries</i>  | Infants 6-59 months               | √ | (17)    |
| <b>Cervical cancer</b><br>HPV vaccination                                                     | HPV16/18 vaccination                                                                                                 | None                                                                                                                                             | Nigeria                                | Females up to age 12              | — | (18–20) |
| <b>HIV/AIDS</b><br>Expanded antiretroviral treatment (ART) for HIV, irrespective of CD4 count | ART initiation with CD4 count > 500                                                                                  | Deferred ART initiation until decline in CD4 reaches < 350, development of AIDS, or development of other conditions necessitating ART initiation | Nigeria                                | All persons aged 19-40            | √ | (20,21) |
| <b>Syphilis</b><br>Prenatal serological screening for syphilis                                | New dual treponemal/nontreponemal point-of-care test (Dual-POC) for prenatal serological screening                   | None                                                                                                                                             | Nigeria +<br><i>multiple countries</i> | Pregnant women                    | √ | (19,22) |
|                                                                                               | New dual treponemal/nontreponemal point-of-care test (Dual-POC) for prenatal serological screening                   | None                                                                                                                                             | Nigeria +<br><i>multiple countries</i> | Infants < 5                       | √ | (19,22) |
|                                                                                               | Point-of-care treponemal immunochromatographic strip (ICS) test for prenatal serological screening                   | None                                                                                                                                             | Nigeria +<br><i>multiple countries</i> | Pregnant women                    | √ | (19,22) |
|                                                                                               | Point-of-care treponemal immunochromatographic strip (ICS) test for prenatal serological screening                   | None                                                                                                                                             | Nigeria +<br><i>multiple countries</i> | Infants < 5                       | √ | (19,22) |
|                                                                                               | Rapid plasma reagin plus Treponema pallidum passive particule agglutination assay for prenatal serological screening | None                                                                                                                                             | Nigeria +<br><i>multiple countries</i> | Pregnant women                    | √ | (19,22) |
|                                                                                               | Rapid plasma reagin plus Treponema pallidum passive particule agglutination assay for prenatal serological screening | None                                                                                                                                             | Nigeria +<br><i>multiple countries</i> | Infants < 5                       | √ | (19,22) |
|                                                                                               | Rapid plasma reagin plus Treponema pallidum passive particule agglutination assay for prenatal serological screening | None                                                                                                                                             | Nigeria +<br><i>multiple countries</i> | Infants < 5                       | √ | (19,22) |

|                                                                          |                                                                                                                      |      |                              |                                       |   |            |
|--------------------------------------------------------------------------|----------------------------------------------------------------------------------------------------------------------|------|------------------------------|---------------------------------------|---|------------|
|                                                                          | Rapid plasma regain (RPR) test for prenatal serological screening                                                    | None | Nigeria + multiple countries | Pregnant women                        | √ | (19,22)    |
|                                                                          | Rapid plasma regain (RPR) test for prenatal serological screening                                                    | None | Nigeria + multiple countries | Infants < 5                           | √ | (19,22)    |
| <b>HIV/AIDS</b>                                                          |                                                                                                                      |      |                              |                                       |   |            |
| Circumcision for HIV prevention                                          | Circumcision for prevention of heterosexual acquisition of HIV                                                       | None | Nigeria + multiple countries | Adult males, age not specified        | √ | (19,21,22) |
| <b>H influenzae type B (Hib) vaccination</b>                             | Haemophilus influenzae Type b (Hib) vaccination                                                                      | None | Nigeria + multiple countries | Infants < 5                           | √ | (19,22)    |
| <b>Lymphatic filariasis</b>                                              | Global Programme to Eliminate Lymphatic Filariasis (GPELF)                                                           | None | Nigeria + multiple countries | All adults at risk, age not specified | — | (19,20,22) |
| <b>Sexually transmitted diseases excluding HIV / Rotaviral enteritis</b> |                                                                                                                      |      |                              |                                       |   |            |
| HPV vaccination                                                          | HPV 16, 18 vaccination                                                                                               | None | Lesotho                      | Females aged 9                        | √ | (23,24)    |
|                                                                          | Human papillomavirus (HPV) vaccine                                                                                   | None | Lesotho                      | Infants < 5                           | √ | (23,24)    |
| <b>Syphilis</b>                                                          |                                                                                                                      |      |                              |                                       |   |            |
| Prenatal serological screening for syphilis                              | New dual treponemal/nontreponemal point-of-care test (Dual-POC) for prenatal serological screening                   | None | Lesotho + multiple countries | Pregnant women                        | — | (23,25)    |
|                                                                          | New dual treponemal/nontreponemal point-of-care test (Dual-POC) for prenatal serological screening                   | None | Lesotho + multiple countries | Infants < 5                           | — | (23,25)    |
|                                                                          | Point-of-care treponemal immunochromatographic strip (ICS) test for prenatal serological screening                   | None | Lesotho + multiple countries | Pregnant women                        | — | (23,25)    |
|                                                                          | Point-of-care treponemal immunochromatographic strip (ICS) test for prenatal serological screening                   | None | Lesotho + multiple countries | Infants < 5                           | — | (23,25)    |
|                                                                          | Rapid plasma reagin plus Treponema pallidum passive particule agglutination assay for prenatal serological screening | None | Lesotho + multiple countries | Pregnant women                        | — | (23,25)    |
|                                                                          | Rapid plasma reagin plus Treponema pallidum passive                                                                  | None | Lesotho + multiple countries | Infants < 5                           | — | (23,25)    |

|                                                                |                                                                                                                      |      |                                   |                                |   |         |
|----------------------------------------------------------------|----------------------------------------------------------------------------------------------------------------------|------|-----------------------------------|--------------------------------|---|---------|
|                                                                | particule agglutination assay for prenatal serological screening                                                     |      |                                   |                                |   |         |
|                                                                | Rapid plasma regain (RPR) test for prenatal serological screening                                                    | None | Lesotho + multiple countries      | Pregnant women                 | — | (23,25) |
|                                                                | Rapid plasma regain (RPR) test for prenatal serological screening                                                    | None | Lesotho + multiple countries      | Infants < 5                    | — | (23,25) |
| <b>HIV/AIDS</b><br>Circumcision for HIV prevention             | Circumcision for prevention of heterosexual acquisition of HIV                                                       | None | Lesotho + multiple countries      | Adult males, age not specified | √ | (26)    |
| <b>H influenzae type B (Hib) vaccination</b>                   | Haemophilus influenzae Type b (Hib) vaccination                                                                      | None | Lesotho + multiple countries      | Infants < 5                    | √ | (23)    |
| <b>Cervical cancer HPV vaccination</b>                         | HPV16/18 vaccination                                                                                                 | None | Sierra Leone                      | Females up to age 12           | × | (27–31) |
| <b>Syphilis</b><br>Prenatal serological screening for syphilis | New dual treponemal/nontreponemal point-of-care test (Dual-POC) for prenatal serological screening                   | None | Sierra Leone + multiple countries | Pregnant women                 | √ | (28,31) |
|                                                                | New dual treponemal/nontreponemal point-of-care test (Dual-POC) for prenatal serological screening                   | None | Sierra Leone + multiple countries | Infants < 5                    | √ | (28,31) |
|                                                                | Point-of-care treponemal immunochromatographic strip (ICS) test for prenatal serological screening                   | None | Sierra Leone + multiple countries | Pregnant women                 | √ | (28,31) |
|                                                                | Point-of-care treponemal immunochromatographic strip (ICS) test for prenatal serological screening                   | None | Sierra Leone + multiple countries | Infants < 5                    | √ | (28,31) |
|                                                                | Rapid plasma reagin plus Treponema pallidum passive particule agglutination assay for prenatal serological screening | None | Sierra Leone + multiple countries | Pregnant women                 | √ | (28,31) |
|                                                                | Rapid plasma reagin plus Treponema pallidum passive particule agglutination assay for prenatal serological screening | None | Sierra Leone + multiple countries | Infants < 5                    | √ | (28,31) |

|                                                                |                                                                                                                      |      |                                   |                                       |   |               |
|----------------------------------------------------------------|----------------------------------------------------------------------------------------------------------------------|------|-----------------------------------|---------------------------------------|---|---------------|
|                                                                | Rapid plasma regain (RPR) test for prenatal serological screening                                                    | None | Sierra Leone + multiple countries | Pregnant women                        | √ | (28,31)       |
|                                                                | Rapid plasma regain (RPR) test for prenatal serological screening                                                    | None | Sierra Leone + multiple countries | Infants < 5                           | √ | (28,31)       |
| <b>HIV/AIDS</b><br>Circumcision for HIV prevention             | Circumcision for prevention of heterosexual acquisition of HIV                                                       | None | Sierra Leone + multiple countries | Adult males, age not specified        | √ | (32)          |
| <b>H influenzae type B (Hib) vaccination</b>                   | Haemophilus influenzae Type b (Hib) vaccination                                                                      | None | Sierra Leone + multiple countries | Infants < 5                           | √ | (31)          |
| <b>Lymphatic filariasis</b>                                    | Global Programme to Eliminate Lymphatic Filariasis (GPELF)                                                           | None | Sierra Leone + multiple countries | All adults at risk, age not specified | √ | (27,29,30,33) |
| <b>Cervical cancer HPV vaccination</b>                         | HPV16/18 vaccination                                                                                                 | None | Swaziland                         | Females up to age 12                  | √ | (34)          |
| <b>Syphilis</b><br>Prenatal serological screening for syphilis | New dual treponemal/nontreponemal point-of-care test (Dual-POC) for prenatal serological screening                   | None | Swaziland + multiple countries    | Pregnant women                        | × | (34–36)       |
|                                                                | New dual treponemal/nontreponemal point-of-care test (Dual-POC) for prenatal serological screening                   | None | Swaziland + multiple countries    | Infants < 5                           | × | (34–36)       |
|                                                                | Point-of-care treponemal immunochromatographic strip (ICS) test for prenatal serological screening                   | None | Swaziland + multiple countries    | Pregnant women                        | × | (34–36)       |
|                                                                | Point-of-care treponemal immunochromatographic strip (ICS) test for prenatal serological screening                   | None | Swaziland + multiple countries    | Infants < 5                           | × | (34–36)       |
|                                                                | Rapid plasma regain plus Treponema pallidum passive particule agglutination assay for prenatal serological screening | None | Swaziland + multiple countries    | Pregnant women                        | × | (34–36)       |

|                                                                              |                                                                                                                      |      |                                |                                |   |         |
|------------------------------------------------------------------------------|----------------------------------------------------------------------------------------------------------------------|------|--------------------------------|--------------------------------|---|---------|
|                                                                              | Rapid plasma reagin plus Treponema pallidum passive particule agglutination assay for prenatal serological screening | None | Swaziland + multiple countries | Infants < 5                    | X | (34–36) |
|                                                                              | Rapid plasma regain (RPR) test for prenatal serological screening                                                    | None | Swaziland + multiple countries | Pregnant women                 | X | (34–36) |
|                                                                              | Rapid plasma regain (RPR) test for prenatal serological screening                                                    | None | Swaziland + multiple countries | Infants < 5                    | X | (34–36) |
| <b>HIV/AIDS</b>                                                              |                                                                                                                      |      |                                |                                |   |         |
| Circumcision for HIV prevention                                              | Circumcision for prevention of heterosexual acquisition of HIV                                                       | None | Swaziland + multiple countries | Adult males, age not specified | √ | (37,38) |
| <b>Sexually transmitted diseases (except HIV, cervical cancer, diarrhea)</b> |                                                                                                                      |      |                                |                                |   |         |
| HPV vaccination                                                              | HPV16/18 vaccination                                                                                                 | None | Cameroon                       | Females up to age 12           | X | (39)    |
|                                                                              |                                                                                                                      |      |                                |                                |   |         |
|                                                                              | New dual treponemal/nontreponemal point-of-care test (Dual-POC) for prenatal serological screening                   | None | Cameroon + multiple countries  | Pregnant women                 | X | (39)    |
|                                                                              | New dual treponemal/nontreponemal point-of-care test (Dual-POC) for prenatal serological screening                   | None | Cameroon + multiple countries  | Infants < 5                    | X | (39)    |
|                                                                              | Point-of-care treponemal immunochromatographic strip (ICS) test for prenatal serological screening                   | None | Cameroon + multiple countries  | Pregnant women                 | X | (39)    |
| <b>Syphilis</b>                                                              |                                                                                                                      |      |                                |                                |   |         |
| Prenatal serological screening for syphilis                                  | Point-of-care treponemal immunochromatographic strip (ICS) test for prenatal serological screening                   | None | Cameroon + multiple countries  | Infants < 5                    | X | (39)    |
|                                                                              | Rapid plasma reagin plus Treponema pallidum passive particule agglutination assay for prenatal serological screening | None | Cameroon + multiple countries  | Pregnant women                 | X | (39)    |
|                                                                              | Rapid plasma reagin plus Treponema pallidum passive particule agglutination assay for prenatal serological screening | None | Cameroon + multiple countries  | Infants < 5                    | X | (39)    |

|                                              |                                                                                                                      |      |                               |                                       |   |         |
|----------------------------------------------|----------------------------------------------------------------------------------------------------------------------|------|-------------------------------|---------------------------------------|---|---------|
|                                              | Rapid plasma regain (RPR) test for prenatal serological screening                                                    | None | Cameroon + multiple countries | Pregnant women                        | X | (39)    |
|                                              | Rapid plasma regain (RPR) test for prenatal serological screening                                                    | None | Cameroon + multiple countries | Infants < 5                           | X | (39)    |
| <b>HIV/AIDS</b>                              |                                                                                                                      |      |                               |                                       |   |         |
| Circumcision for HIV prevention              | Circumcision for prevention of heterosexual acquisition of HIV                                                       | None | Cameroon + multiple countries | Adult males, age not specified        | X | (39,40) |
| <b>H influenzae type B (Hib) vaccination</b> | Haemophilus influenzae Type b (Hib) vaccination                                                                      | None | Cameroon + multiple countries | Infants < 5                           | √ | (39)    |
| <b>Lymphatic filariasis</b>                  | Global Programme to Eliminate Lymphatic Filariasis (GPELF)                                                           | None | Cameroon + multiple countries | All adults at risk, age not specified | √ | (39)    |
| <b>Cervical cancer</b>                       |                                                                                                                      |      |                               |                                       |   |         |
| HPV vaccination                              | HPV16/18 vaccination                                                                                                 | None | Liberia                       | Females up to age 12                  | √ | (41)    |
|                                              | New dual treponemal/nontreponemal point-of-care test (Dual-POC) for prenatal serological screening                   | None | Liberia + multiple countries  | Pregnant women                        | — | (42)    |
|                                              | New dual treponemal/nontreponemal point-of-care test (Dual-POC) for prenatal serological screening                   | None | Liberia + multiple countries  | Infants < 5                           | — | (42)    |
|                                              | Point-of-care treponemal immunochromatographic strip (ICS) test for prenatal serological screening                   | None | Liberia + multiple countries  | Pregnant women                        | — | (42)    |
| <b>Syphilis</b>                              |                                                                                                                      |      |                               |                                       |   |         |
| Prenatal serological screening for syphilis  | Point-of-care treponemal immunochromatographic strip (ICS) test for prenatal serological screening                   | None | Liberia + multiple countries  | Infants < 5                           | — | (42)    |
|                                              | Rapid plasma reagin plus Treponema pallidum passive particule agglutination assay for prenatal serological screening | None | Liberia + multiple countries  | Pregnant women                        | — | (42)    |
|                                              | Rapid plasma reagin plus Treponema pallidum passive particule agglutination assay for prenatal serological screening | None | Liberia + multiple countries  | Infants < 5                           | — | (42)    |

|                                              |                                                                   |      |                              |                                       |   |            |
|----------------------------------------------|-------------------------------------------------------------------|------|------------------------------|---------------------------------------|---|------------|
|                                              | Rapid plasma regain (RPR) test for prenatal serological screening | None | Liberia + multiple countries | Pregnant women                        | — | (42)       |
|                                              | Rapid plasma regain (RPR) test for prenatal serological screening | None | Liberia + multiple countries | Infants < 5                           | — | (42)       |
| <b>HIV/AIDS</b>                              | Circumcision for prevention of heterosexual acquisition of HIV    | None | Liberia + multiple countries | Adult males, age not specified        | ✓ | (43)       |
| <b>H influenzae type B (Hib) vaccination</b> | Haemophilus influenzae Type b (Hib) vaccination                   | None | Liberia + multiple countries | Infants < 5                           | ✓ | (41,42,44) |
| <b>Lymphatic filariasis</b>                  | Global Programme to Eliminate Lymphatic Filariasis (GPELF)        | None | Liberia + multiple countries | All adults at risk, age not specified | — | (42,44)    |

\* Time spans of each included plan: Malawi: 2015-2022; Zimbabwe: 2015-2020; South Africa: 2015-2022; Zambia: 2015-2021; Nigeria: 2010-2018; Lesotho: 2012-2022; Sierra Leone: 2010-2021; Swaziland: 2014-2018; Cameroon: 2016-2020; Liberia: 2011-2021

| <b>Appendix, Table 3: Excluded countries in our sample identification<br/>DALYs/100,000 extracted from 2017 (45)</b> |                          |                                                                                                          |
|----------------------------------------------------------------------------------------------------------------------|--------------------------|----------------------------------------------------------------------------------------------------------|
| <b>Country</b>                                                                                                       | <b>DALYs per 100,000</b> | <b>Reason for exclusion</b>                                                                              |
| Central African Republic                                                                                             | 89,692                   | Official languages: French and Sango + no cost-saving interventions published                            |
| South Sudan                                                                                                          | 71,068                   | No cost-saving interventions published                                                                   |
| Chad                                                                                                                 | 71,486                   | Official languages: Arabic and French + no cost-saving interventions published                           |
| Mali                                                                                                                 | 69,096                   | Official language: French + no cost-saving interventions published                                       |
| Niger                                                                                                                | 61,357                   | Official language: French + no cost-saving interventions published                                       |
| Burkina Faso                                                                                                         | 61,147                   | Official languages: French, Moore, Fula, Dioula                                                          |
| Guinea                                                                                                               | 58,109                   | Official language: French                                                                                |
| Mozambique                                                                                                           | 56,427                   | Official language: Portuguese                                                                            |
| Somalia                                                                                                              | 58,321                   | No cost-saving interventions published                                                                   |
| Guinea Bissau                                                                                                        | 55,152                   | Official languages: Portuguese and Upper Guinea Creole                                                   |
| Democratic Republic of Congo                                                                                         | 54,769                   | Official languages: French, Lingala, Kikongo, Swahili, Tshiluba + no cost-saving interventions published |
| Papua New Guinea                                                                                                     | 52,604                   | No cost-saving interventions published                                                                   |
| Burundi                                                                                                              | 50,800                   | Official languages: Kirundi, French, and English; Policy documentation in French                         |
| Côte d'Ivoire                                                                                                        | 50,387                   | Official language: French + no cost-saving interventions published                                       |
| Madagascar                                                                                                           | 50,125                   | Official languages: Malagasy and French                                                                  |
| Republic of Congo                                                                                                    | 45,188                   | Official languages: French, Kituba, Kikongo, Lingala                                                     |
| Angola                                                                                                               | 46,503                   | Official language: Portuguese                                                                            |



**APPENDIX REFERENCES**

1. Neumann PJ, Thorat T, Zhong Y, Anderson J, Farquhar M, Salem M, et al. A Systematic Review of Cost-Effectiveness Studies Reporting Cost-per-DALY Averted. Speybroeck N, editor. PLOS ONE. 2016 Dec 22;11(12):e0168512.
2. Neumann PJ, Greenberg D, Olchanski NV, Stone PW, Rosen AB. Growth and Quality of the Cost–Utility Literature, 1976–2001. *Value Health*. 2005 Jan 1;8(1):3–9.
3. Malawi Ministry of Health. Malawi National Community Health Strategy 2017 - 2022 [Internet]. Healthy Newborn Network. [cited 2018 Nov 26]. Available from: <https://www.healthynewbornnetwork.org/resource/malawi-national-community-health-strategy-2017-2022/>
4. USAID, HHS, CDC, US Department of State. US President’s Malaria Initiative, Malawi: Abbreviated Malaria Operational Plan FY 2019 [Internet]. Available from: <https://www.pmi.gov/docs/default-source/default-document-library/malaria-operational-plans/fy19/fy-2019-malawi-abbreviated-malaria-operational-plan.pdf?sfvrsn=5>
5. Health Finance and Governance Project, USAID. Essential Health Services: Malawi | HFG [Internet]. 2015 [cited 2018 Nov 26]. Available from: <https://www.hfgproject.org/essential-package-of-health-services-country-snapshot-malawi/>
6. PEPFAR & Government of Malawi. Malawi Country Operational Plan 2018: Strategic Direction Summary [Internet]. 2017. Available from: <https://www.pepfar.gov/documents/organization/285859.pdf>
7. Zimbabwe Ministry of Health and Child Care. Zimbabwe Expanded Programme on Immunisation Comprehensive Multi Year Plan (2015-2019) [Internet]. Available from: [http://www.nationalplanningcycles.org/sites/default/files/country\\_docs/Zimbabwe/zimbabwe\\_epi\\_cmyip\\_2015\\_-\\_2019.pdf](http://www.nationalplanningcycles.org/sites/default/files/country_docs/Zimbabwe/zimbabwe_epi_cmyip_2015_-_2019.pdf)
8. PEPFAR & Government of Zimbabwe. Zimbabwe Country Operational Plan 2018: Revised Strategic Direction Summary [Internet]. Available from: <https://www.pepfar.gov/documents/organization/285847.pdf>
9. Zimbabwe Ministry of Health and Child Care. The National Health Strategy for Zimbabwe (2016-2020). Equity & Quality in Health: Leaving No One Behind. [Internet]. Available from: [https://www.unicef.org/zimbabwe/National\\_Health\\_Strategy\\_for\\_Zimbabwe\\_2016-2020\\_FINAL.pdf](https://www.unicef.org/zimbabwe/National_Health_Strategy_for_Zimbabwe_2016-2020_FINAL.pdf)

10. South Africa National Department of Health. South Africa's National Strategic Plan for HIV, TB, and STIs (2017-2022) [Internet]. Available from: [http://sanac.org.za/wp-content/uploads/2017/05/NSP\\_FullDocument\\_FINAL.pdf](http://sanac.org.za/wp-content/uploads/2017/05/NSP_FullDocument_FINAL.pdf)
11. South Africa National Department of Health. South Africa's Department of Health National Strategic Plan (2015-2020) [Internet]. Available from: [https://www.childrenandaids.org/sites/default/files/2017-04/SouthAfrica\\_National-Health-Strategic-Plan\\_2015.pdf](https://www.childrenandaids.org/sites/default/files/2017-04/SouthAfrica_National-Health-Strategic-Plan_2015.pdf)
12. Zambia Ministry of Health. Zambia National Health Strategic Plan 2017-2021. 2016 [cited 2018 Nov 26]; Available from: <http://dspace.unza.zm:8080/xmlui/handle/123456789/5113>
13. PEPFAR & Government of Zambia. Zambia Country Operational Plan 2018: Strategic Direction Summary [Internet]. 2018. Available from: <https://www.pepfar.gov/documents/organization/285848.pdf>
14. Health Finance and Governance Project, USAID. Essential Health Services: Zambia | HFG [Internet]. 2015 [cited 2018 Nov 26]. Available from: <https://www.hfgproject.org/essential-package-of-health-services-country-snapshot-zambia/>
15. Zambia Ministry of Health. Zambia's Reproductive, Maternal, Newborn, Child, and Adolescent Health and Nutrition Communication and Advocacy Strategy 2018-2021 [Internet]. Available from: [http://www.moh.gov.zm/?wpfb\\_dl=111](http://www.moh.gov.zm/?wpfb_dl=111)
16. African Health Observatory [Internet]. African Health Observatory. [cited 2018 Dec 17]. Available from: <http://www.aho.afro.who.int/en>
17. USAID, HHS, CDC, US Department of State. US President's Malaria Initiative, Zambia: Malaria Operational Plan FY 2019 [Internet]. Available from: <https://www.pmi.gov/docs/default-source/default-document-library/malaria-operational-plans/fy19/fy-2019-zambia-malaria-operational-plan.pdf?sfvrsn=3>
18. Nigeria National Primary Health Care Development Agency. Nigerian National Routine Immunization Strategic Plan (2013-2015) [Internet]. Available from: [http://www.nationalplanningcycles.org/sites/default/files/country\\_docs/Nigeria/ri\\_strategic\\_plan\\_combined\\_mahmud\\_draft\\_1.pdf](http://www.nationalplanningcycles.org/sites/default/files/country_docs/Nigeria/ri_strategic_plan_combined_mahmud_draft_1.pdf)
19. Health Finance and Governance Project, USAID. Essential Health Services: Nigeria | HFG [Internet]. [cited 2018 Dec 17]. Available from: <https://www.hfgproject.org/essential-package-of-health-services-country-snapshot-nigeria/>

20. Nigeria Federal Ministry of Health. Nigeria National Health Policy 2016: Promoting the Health of Nigerians to Accelerate Socio-Economic Development [Internet]. 2016. Available from: [http://www.nationalplanningcycles.org/sites/default/files/planning\\_cycle\\_repository/nigeria/draft\\_nigeria\\_national\\_health\\_policy\\_final\\_december\\_fmoh\\_edited.pdf](http://www.nationalplanningcycles.org/sites/default/files/planning_cycle_repository/nigeria/draft_nigeria_national_health_policy_final_december_fmoh_edited.pdf)
21. PEPFAR & Government of Nigeria. Nigeria Country Operational Plan 2018: Strategic Direction Summary [Internet]. 2018. Available from: <https://www.pepfar.gov/documents/organization/285856.pdf>
22. Federal Ministry of Health. Nigeria National Strategic Health Development Plan (NSHDP) 2010-2015.
23. Government of Lesotho. Lesotho National Health Strategic Plan (NHSP 2017-2022) [Internet]. 2016. Available from: [http://www.nationalplanningcycles.org/sites/default/files/planning\\_cycle\\_repository/lesotho/lesotho\\_revised\\_nhsp\\_2017-22\\_final\\_draft1.pdf](http://www.nationalplanningcycles.org/sites/default/files/planning_cycle_repository/lesotho/lesotho_revised_nhsp_2017-22_final_draft1.pdf)
24. Government of Lesotho. Lesotho Expanded Programme on Immunisation Comprehensive Multi-Year pLan (2012-2016) [Internet]. 2012. Available from: [http://www.nationalplanningcycles.org/sites/default/files/country\\_docs/Lesotho/new\\_cmulti\\_year\\_plan\\_2012-2016\\_for\\_submission\\_revised\\_on\\_17\\_jan\\_2012.pdf](http://www.nationalplanningcycles.org/sites/default/files/country_docs/Lesotho/new_cmulti_year_plan_2012-2016_for_submission_revised_on_17_jan_2012.pdf)
25. Government of Lesotho. Lesotho Health Sector Strategic Plan 2012-2017. 2013.
26. PEPFAR & Governmet of Lesotho. Lesotho Country Operational Plan 2018: Strategic Direction Summary [Internet]. 2018. Available from: <https://www.pepfar.gov/documents/organization/285860.pdf>
27. Ministry of Health and Sanitation. Sierra Leone Annual Health Sector Performance Report 2016 [Internet]. Available from: <https://afro.who.int/sites/default/files/2017-08/Sierra%20Leone%20Health%20Sector%20%20Performance%20Report%202016.pdf>
28. Ministry of Health and Sanitation. Sierra Leone Basic Package of Essential Health Services [Internet]. 2010. Available from: <http://apps.who.int/medicinedocs/documents/s19423en/s19423en.pdf>
29. Ministry of Health and Sanitation, Health Education Division. Sierra Leone National Health Promotion Strategy 2017-2021. 2016.

30. Ministry of Health and Sanitation. Sierra Leone National Health Sector Strategic Plan 2017-2021 [Internet]. 2017. Available from: [http://www.nationalplanningcycles.org/sites/default/files/planning\\_cycle\\_repository/sierra\\_leone/sierra\\_leone\\_nhssp\\_2017-21\\_final\\_sept2017.pdf](http://www.nationalplanningcycles.org/sites/default/files/planning_cycle_repository/sierra_leone/sierra_leone_nhssp_2017-21_final_sept2017.pdf)
31. Ministry of Health and Sanitation. Sierra Leone Basic Package of Essential Health Services 2015-2020 [Internet]. 2015. Available from: [https://mohs2017.files.wordpress.com/2017/06/gosl\\_2015\\_basic-package-of-essential-health-services-2015-2020.pdf](https://mohs2017.files.wordpress.com/2017/06/gosl_2015_basic-package-of-essential-health-services-2015-2020.pdf)
32. Sierra Leone National AIDS Secretariat. Sierra Leone National Strategic Plan on HIV/AIDS 2016-2020: Rapid Response Initiative to Ending HIV as a Public Health and Development Problem. 2015.
33. Sierra Leone Ministry of Health and Sanitation. Sierra Leone National Neglected Tropical Disease Programme (NTDP): Master Plan for Neglected Tropical Diseases Elimination in Sierra Leone (2016-2020).
34. Swaziland - The Second National Health Sector Strategic Plan 2014-2018: Towards attainment of Universal Health Coverage [Internet]. 2014. Available from: [http://www.nationalplanningcycles.org/sites/default/files/planning\\_cycle\\_repository/swaziland/swaziland\\_nhssp\\_ii\\_draft\\_zero\\_29\\_aug\\_2014.pdf](http://www.nationalplanningcycles.org/sites/default/files/planning_cycle_repository/swaziland/swaziland_nhssp_ii_draft_zero_29_aug_2014.pdf)
35. Swaziland Ministry of Health. Swaziland National Policy on Sexual and Reproductive Health | K4Health [Internet]. [cited 2018 Nov 26]. Available from: <https://www.k4health.org/toolkits/swaziland-hiv-prevention/swaziland-national-policy-sexual-and-reproductive-health>
36. Kingdom of Swaziland. Swaziland's Government Programme of Action 2013-2018, Ministries' Action Plans to 2018 and 2022. [Internet]. Available from: <http://www.gov.sz/images/ministries%20action%20plans%20pdf.pdf>
37. Swaziland Ministry of Health. Swaziland Male Circumcision Strategic and Operational Plan for HIV Prevention 2014-2018 [Internet]. Available from: <https://www.infocenter.nercha.org.sz/sites/default/files/Swaziland%20Male%20Circumcision%20Strategic%20and%20Operational%20Plan%202014%20-2018.pdf>
38. PEPFAR & Government of Swaziland. Swaziland Country Operational Plan 2018: Strategic Direction Summary [Internet]. 2018. Available from: <https://www.pepfar.gov/documents/organization/285864.pdf>

39. Ministry of Public Health. Cameroon National Health Development Plan 2016-2020 [Internet]. 2016. Available from: <https://www.minsante.cm/site/?q=en/content/national-health-development-plan-nhdp-2016-2020>
40. PEPFAR & Government of Cameroon. Cameroon Country Operational Plan 2019: Strategic Direction Summary [Internet]. 2019. Available from: [https://www.state.gov/wp-content/uploads/2019/09/Cameroon\\_COP19-Strategic-Directional-Summary\\_public.pdf](https://www.state.gov/wp-content/uploads/2019/09/Cameroon_COP19-Strategic-Directional-Summary_public.pdf)
41. Liberia Ministry of Health and Social Welfare. Liberia Ministry of Health National EPI Strategic Plan (Draft) 2016-2020 [Internet]. Available from: [http://www.nationalplanningcycles.org/sites/default/files/planning\\_cycle\\_repository/liberia/liberia\\_cmyr\\_2016\\_2020.pdf](http://www.nationalplanningcycles.org/sites/default/files/planning_cycle_repository/liberia/liberia_cmyr_2016_2020.pdf)
42. Liberia Ministry of Health and Social Welfare. Liberia National Health & Social Welfare Policy and Plan 2011-2021 [Internet]. Available from: [http://moh.gov.lr/wp-content/uploads/2017/03/2011-2021-National-Health-Policy-Plan\\_MOH.pdf](http://moh.gov.lr/wp-content/uploads/2017/03/2011-2021-National-Health-Policy-Plan_MOH.pdf)
43. Liberia National AIDS Commission. Liberia National HIV Prevention Strategy 2017-2020 [Internet]. Available from: [http://www.nacliberia.org/doc/HIV%20prevention%20strategy%20Liberia-\\_Final%20Version\\_%2018-04-17\\_.pdf](http://www.nacliberia.org/doc/HIV%20prevention%20strategy%20Liberia-_Final%20Version_%2018-04-17_.pdf)
44. Liberia Ministry of Health and Social Welfare. Liberia National Policy & Strategic Plan on Health Promotion 2016-2021 [Internet]. Available from: <https://afro.who.int/sites/default/files/2017-06/National%20Policy%20and%20Strategic%20Plan%20on%20Health%20Promotion%2C%20Liberia%2C%202016%20-%202021.pdf>
45. IHME. GBD Compare | IHME Viz Hub [Internet]. [cited 2018 Nov 16]. Available from: <http://vizhub.healthdata.org/gbd-compare>
